1     **Number of children and body composition in later**  
2     **life among men and women: Results from a British**  
3             **birth cohort study**

4             **Running Title:** Number of children and body composition

5             **Authors:** Charis Bridger Staatz<sup>a\*</sup>, Rebecca Hardy<sup>a</sup>

6                             **Affiliations:**

7                             MRC Unit for Lifelong and Health Ageing at UCL, Department of Population Health and  
8                             Experimental Medicine, University College London, London, UK.<sup>a</sup>

9     \*Corresponding Author

10    Email: [charis.staatz.17@ucl.ac.uk](mailto:charis.staatz.17@ucl.ac.uk)

11    Acknowledgements: We thank NSHD study members for their lifelong participation and past and  
12    present members of the NSHD study team who helped to collect the data. Data used in this  
13    publication are available to bona fide researchers upon request to the NSHD Data Sharing Committee  
14    via a standard application procedure. Further details can be found at <http://www.nshd.mrc.ac.uk/data>.  
15    doi:10.5522/NSHD/Q101; doi:10.5522/NSHD/Q102

16    CBS is supported by a PhD studentship from the UK Medical research Council (MR/N013867/1). The  
17    MRC NSHD and RH are supported by the UK Medical Research Council (MC\_UU\_12019/1,  
18    MC\_UU\_12019/2).

19

20

## Abstract

### 21 **Background**

22 Although research has found associations between increasing number of children and higher body mass  
23 index (BMI), there has been limited research investigating the association with body composition despite  
24 abdominal fat being associated with cardiovascular and metabolic risk independently of general adiposity.  
25 Most existing research has focussed on women, but investigating the relationship in men can help  
26 distinguish biological effects of pregnancy from social pathways related to parenthood.

### 27 **Methods**

28 Using the MRC National Survey of Health and Development (NSHD) multiple regression models were  
29 applied to test associations between number of children and body composition at age 60-64 (N=2229) and  
30 body mass index (BMI) and waist circumference (WC) at ages 60-64 and 69 (N=2149).

### 31 **Results**

32 In adjusted models, associations were observed between increasing numbers of children and increasing fat-  
33 adjusted lean mass index in women ( $p=0.06$ ). Among men, those with children had 0.59kg (95% CI: 0.15  
34 to 1.02) greater lean mass index than those without and fat:lean mass ratio was greater in those with 4+  
35 children because of their slightly higher mean fat mass. Weak evidence of a higher android:gynoid mass  
36 ratio in women with children (0.03, 95% CI: 0.00,0.06,  $p=0.1$ ) was observed with no associations with fat  
37 mass index or android or gynoid fat mass. Increasing BMI was observed with increasing parity in women  
38 at 60-64 and more strongly at 69 years where associations among men were also observed more clearly.

### 39 **Conclusion**

40 There was little evidence of a consistent association between number of children and body composition in  
41 early old age. The strongest associations are observed for lean, rather than fat mass, and in men rather than  
42 women, suggesting little evidence of biological effects of pregnancy in women. The results indicate social

43 pathways associated with parenthood are the likely underlying mechanisms, with suggestion there may be

44 selection into parenthood among men.

45

46

## Introduction

47 Characteristics of family formation such as number of children, age of first birth, age of last birth and birth  
48 intervals have been associated with subsequent overweight and obesity (1-7). The majority of studies have  
49 focussed only on women due, at least in part, to the assumption that there is a biological pathway between  
50 pregnancy, child birth and obesity. The majority of studies have found parous women to have greater body  
51 mass index (BMI), greater risk of obesity (1, 8-10) or faster weight gain trajectories (2, 3, 11, 12) than  
52 nulliparous women, with associations also observed between increasing number of children and higher  
53 BMI. However, differences in associations do exist according to the age at BMI measurement (11) with  
54 few studies investigating the relationship with BMI measured past mid-life, area of residence (non-  
55 metropolitan compared to metropolitan) (13), and according to race and ethnicity (3, 10-13). Social and  
56 behavioural factors related to parenting provide an alternative explanation to the biological effects of  
57 pregnancy for any such association. For example, parents have been found to eat more saturated fat than  
58 non-parents (12, 14), and those with 4 or more children are more likely to be smokers, inactive and from a  
59 manual social class (1). It has therefore been suggested that parenthood changes the social contexts in  
60 which people live in a way that impacts their BMI (12).

61 Biological pathways, such as reduced exposure to oestrogen or increased levels of relative insulin  
62 resistance (15), have been implicated in the association between pregnancy and cardiovascular disease  
63 (CVD), with the effect of pregnancy on abdominal obesity being one potential explanatory mechanism  
64 (16). Hence, biological effects of pregnancy may be particularly strong when considering fat distribution  
65 and body composition, rather than general markers of adiposity such as BMI. There is increasing evidence  
66 that fat mass and android and visceral fat are related to cardiovascular and metabolic risk factors  
67 independently of BMI and even among those who are not overweight (17-19). Few studies have assessed  
68 the association between parity and body composition. Existing studies, which have shown an association  
69 between parity and increased visceral adiposity measured using computed tomography (CT), have been  
70 based on small sample sizes ( $n \leq 170$ ) (20, 21). One of these studies considered the change in adiposity pre-  
71 and post-pregnancy (21). The other study, based on a highly age heterogeneous sample (age 18 to 76), also  
72 considered percent body fat measured by dual-energy x-ray absorptiometry (DXA) scans finding no  
73 association with parity after adjustment for age, physical activity and smoking (20). A larger study using

74 DXA scans to measure body composition at a mean age of 59.7 years carried out in an Asian population,  
75 did not consider number of children, but found that earlier age of first birth was associated with increased  
76 trunk fat mass (22). However, these findings may not be generalizable to western populations as visceral  
77 and abdominal fat distribution for a given BMI is higher in Asian compared to western populations (23).

78 There has been growing interest in the impact of becoming a father on health, with a few studies  
79 suggesting that number of children is associated with obesity and higher BMI in men as well as women (1,  
80 9). It remains unclear as to whether associations are stronger in men or women as results have so far been  
81 inconsistent (2), and to our knowledge there have been no studies investigating associations with body  
82 composition in men. Investigating the relationship between parenthood and obesity in men as well as  
83 women can also help distinguish a biological effect of pregnancy from a social pathway related to  
84 parenthood (8); similar associations in both sexes would suggest that the underlying mechanisms are social  
85 as opposed to biological.

86 Using data from the Medical Research Council (MRC) National Survey of Health and Development  
87 (NSHD), a British birth cohort born in 1946, we investigated the relationship between number of children  
88 and body composition measured using DXA scans at ages 60-64 in men and women. Previous research in  
89 NSHD has shown that greater number of children in women, and being a parent in men, was associated  
90 with higher BMI at age 53. Therefore we also assess whether such associations remain into old age,  
91 investigating the association between number of children and BMI and waist circumference (WC)  
92 measured at the same age as body composition (60-64) and also at 69. We assess the extent to which  
93 associations can be explained by lifestyle and behavioural factors related to family life.

## 94 **Materials and methods**

95 The MRC NSHD is a socially stratified sample of 2547 women and 2815 men born in one week in March  
96 1946 in England, Scotland and Wales. There have been 24 follow ups including interviews with the  
97 mothers, assessments by school doctors and teachers during childhood, and home visits and postal  
98 questionnaires during adult life. When study members were aged 60-64, 2856 individuals were invited for  
99 assessment at one of six clinical research facilities (CRF) or to have a nurse visit them in their own home.  
100 Invitations were not sent to those who had died (n=778), who were living abroad (n=570), who had

101 previously withdrawn from the study (n=594), or who had been lost to follow-up (n=564). Of those  
102 invited, a total of 2229 (78%) were assessed, with 1690 (59%) attending a CRF and the remaining 539  
103 being visited at home. At the clinic visit study members underwent (DXA) scans. The most recent data  
104 collection took place in 2015 when participants were aged 69 years when 2149 were interviewed and  
105 examined in their own homes by a team of research nurses.

106

107 Ethical approval for the age 60-64 data collection was obtained from the Greater Manchester Local  
108 Research Ethics Committee and the Scotland A Research Ethics Committee, and for the age 69 data  
109 collection from the Queens Square Research Ethics Committee and the Scotland A Research Ethics  
110 Committee. Written informed consent was obtained from the study members at each data collection.

111

## 112 **Outcome variables**

113 Measures of body composition were obtained at the CRFs using a QDR 4500 Discovery DXA scanner  
114 (Hologic Inc, Bedford, MA, USA) whilst the individuals were in a supine position. The measures of body  
115 composition used in these analyses were whole body, android and gynoid fat mass and whole body lean  
116 mass defined as total mass minus fat and bone mass. For all measures, mass from the head was excluded  
117 and measures were converted to kg. Full details described elsewhere (24, 25). Fat mass index ( $\text{kg}/\text{m}^2$ ) and  
118 lean mass index ( $\text{kg}/\text{m}^2$ ) were calculated by dividing the measures by  $\text{height}^2$ . Fat-to-lean mass ratio and  
119 android-to-gynoid fat mass ratio were derived.

120 The anthropometric measures of height, weight, and waist circumference were measured by the nurses  
121 using standard protocols at ages 60-64 at both CRFs and home visits and at 69 at the home visits. BMI  
122 (defined as  $\text{weight (kg)}/\text{height(m)}^2$ ) was calculated.

123

## 124 **Explanatory variable**

125 Number of children was derived from the number of new live births since age 53 reported at age 60-64  
126 added to previous reports of number of live births collected throughout adult life at ages of 36, 43 and 53.  
127 For the purpose of analysis and due to the small numbers with four or more children, all those who  
128 reported having four or more children were combined into one group.

## 129 **Confounding variables**

130 Potential confounders, identified from previous research as being associated with both number of births  
131 and adiposity, were childhood cognitive function, childhood and adult socioeconomic position, education  
132 and cigarette smoking. Cognitive function in childhood was calculated from the sum of standardised verbal  
133 and non-verbal cognitive tests taken at age 8. Socioeconomic position was measured by father's  
134 occupational social class when the study member was aged 4 (or 7 or 11 if missing) and by occupational  
135 social class of the head of the household at age 53. The Register General classification system was used to  
136 categorise into I Professional; II Intermediate; IIINM Skilled (Non-Manual); IIIM Skilled (Manual); IV  
137 Partly skilled; V Unskilled. Highest educational qualification by age 26 was classified into (1) No  
138 Qualifications; (2) Below O-Level; (3) O-Level or Equivalent; (4) A-Level or Equivalent; (5) Degree  
139 Level or higher. Smoking status was self-reported at the age of 60-64 (and at previous ages) and was  
140 classified as current smoker, ex-smoker and never smoker.

## 141 **Statistical analysis**

142 Multivariable regression models were used to examine the associations between number of children (with  
143 no children as the reference group) and each DXA measure and BMI and WC at 60-64. A test for deviation  
144 from a linear trend across groups of number of children was carried out and where significant deviations  
145 from linearity were detected ( $P \leq 0.05$ ), tests for heterogeneity across groups were carried out. Where there  
146 was no evidence of deviation from linearity, number of children was fitted as a continuous variable to  
147 obtain a test for linearity. Analyses were carried out separately for men and women, and in addition, sex by  
148 number of children interactions were included to test whether the associations differed between men and  
149 women in models including both sexes. Models were then adjusted for all potential confounding variables  
150 and for lean mass index as the outcome, models were further adjusted for fat mass index due to the  
151 adaptive changes in lean mass with increasing fat mass(25). Similar models were fitted for BMI and WC at

152 age 69 to assess whether associations were consistent with those at age 60-64. Since it has previously been  
153 observed that there are differences in outcomes between those with children and those without(1, 26),  
154 models were also fitted to test differences between those with at least one child and those with no children  
155 and then, in parents only, to test associations with number of children using one child as the reference  
156 group. All analysis was carried out using Stata14 (Stata Corp., College Station, TX, USA).

## 157 **Multiple imputation**

158 Since there was some missing covariate information, multiple imputation was used in order to maintain the  
159 sample size. A total of 20 imputed data sets were obtained using chained equations including all variables  
160 in the adjusted models and additional variables to aid the imputation process (other measures of  
161 socioeconomic position, earlier life BMI and waist circumference). Rubin's rule was used to combine the  
162 estimates from regression models from each of the 20 datasets. For fat mass index, lean mass index and  
163 fat-to-lean ratio, 304 (20%) (Male=152, Female=152) of the analytic sample had missing data on at least  
164 one covariate. For android fat, gynoid fat and android-gynoid ratio, the number was 318 and for BMI and  
165 waist circumference aged 60-64, 456 and 457, respectively. At age 69, the number was 348 for both BMI  
166 and waist circumference.

## 167 **Sensitivity analysis**

168 The characteristics of those who attended a CRF, and who therefore had a DXA scan at age 60-64, have  
169 previously found to differ from those who had a home visit, with indication that they tended to be  
170 healthier(27). Therefore a sensitivity analysis was carried out to examine whether this difference in sample  
171 characteristics might have influenced associations in the subgroup who had DXA measures. We compared  
172 the difference in mean BMI and WC at age 60-64 between those who had DXA measures and those who  
173 had a home visit (and therefore did not have DXA measures). We then repeated analysis of BMI and WC  
174 at age 60-64 in the sample who had DXA measures.



175

## Results

176 Characteristics of the sample (N=2331, 52.2% female) who had at least one of the outcome variables and a  
 177 valid record of number of live births are presented in Table 1. Mean fat-to-lean ratio, fat mass index and  
 178 gynoid fat were higher in women compared to men, whilst all other measures were higher in men. Mean  
 179 BMI was similar in men and women at both ages 60-64 and 69 and, as expected, mean WC was higher in  
 180 men compared to women. The median number of children was 2 for both men and women, with few  
 181 individuals with 4 or more children (7.27% and 8.46%, respectively).

**Table 1. Characteristics of men and women in the analytic sample**

| Variable                                            | Male        |                   | Female      |               |
|-----------------------------------------------------|-------------|-------------------|-------------|---------------|
|                                                     | Number (%)  | Mean (SD)         | Number (%)  | Mean (SD)     |
| Fat Mass Index at 60-64 (kg/m <sup>2</sup> )        | 701         | 7.72 (2.33)       | 787         | 11.1 (3.47)   |
| Lean Mass Index at 60-64 (kg/m <sup>2</sup> )       | 701         | 17.42 (1.97)      | 787         | 14.18 (1.84)  |
| Fat- Lean Mass ratio at 60-64                       | 701         | 0.44 (0.11)       | 787         | 0.77 (0.19)   |
| Android Fat at 60-64 (kg)                           | 731         | 2.49 (0.97)       | 830         | 2.33 (1.02)   |
| Gynoid Fat at 60-64 (kg)                            | 731         | 3.76 (1.01)       | 830         | 5.13 (1.48)   |
| Android-Gynoid Ratio at 60-64                       | 731         | 1.18 (0.18)       | 830         | 0.92 (0.15)   |
| Body Mass Index at 60-64 years (kg/m <sup>2</sup> ) | 990         | 27.85 (4.08)      | 1,117       | 28.00 (5.51)  |
| Waist Circumference at 60-64 years (cm)             | 990         | 100.68<br>(11.02) | 1,115       | 92.56 (13.09) |
| Body Mass Index at 69 years (kg/m <sup>2</sup> )    | 961         | 28.15 (4.55)      | 1,047       | 28.21 (5.96)  |
| Waist Circumference at 69 years (cm)                | 961         | 100.93<br>(12.21) | 1,053       | 92.39 (13.91) |
| <b>Number of Children*</b>                          |             |                   |             |               |
| 0                                                   | 163 (14.63) |                   | 133 (10.93) |               |
| 1                                                   | 117 (10.50) |                   | 142 (11.67) |               |
| 2                                                   | 551 (49.46) |                   | 563 (46.26) |               |
| 3                                                   | 202 (18.13) |                   | 276 (22.68) |               |
| 4+                                                  | 81 (7.27)   |                   | 103 (8.46)  |               |
| <b>Total</b>                                        | 1,114       |                   | 1,217       |               |

182 \*Taken from the number of children reported at age 60-64

## 183 **Body composition**

184 Fat mass index and lean mass index were available for 701 men and 787 women and android and gynoid  
185 fat for 731 men and 830 women. There was little evidence of a trend across number of children categories  
186 for the majority of body composition measures in either men or women (Table 2). Associations between  
187 number of children and lean mass index were observed for both sexes. Higher mean lean mass index was  
188 observed in men with children compared to those without and there was weak evidence that increasing  
189 parity was associated with increasing lean mass index in women (although there was no evidence of a sex  
190 interaction). These findings were confirmed in the analysis comparing men with one or more children to  
191 those with no children where the mean difference in lean mass index was 0.59kg (95% CI: 0.15 to 1.02,  
192  $P=0.008$ ) and among those with at least one child for women (Table.3). Among men, there was also a  
193 suggestion of a non-linear relationship between number of children and fat:lean mass ratio where those  
194 with 1, 2 or 3 children had lower ratios than men with either 0 or 4+ children (Table 2). Men with 4+  
195 children, despite having greatest lean mass index, also had greatest mean fat mass index, resulting in a  
196 ratio which was greater than men with fewer children. The higher fat mass in men with 4+ children was  
197 confirmed in analyses including only parents ( $p=0.05$ , Table.3). Associations were hardly affected  
198 following adjustment for confounders (Table.2) with slight attenuation of effects for lean mass index and  
199 very slight strengthening for the ration in men. Among women, there was weak evidence that those with  
200 children had higher android:gynoid fat mass ratio than those without children (0.03 (95% CI: 0.00-0.06)  
201 higher,  $p=0.1$ ) (Table.3).

202

**Table 2. Adjusted and unadjusted regression coefficients (mean differences) and 95% confidence intervals (95% CI) for each measure of body composition at 60-64 years and body mass index and waist circumference at 60-64 and 69 years in men and women**

| Outcome Variable                          | N   | Unadjusted                                                                         |                       |                       |                      | P value,<br>trend | Adjusted**                                                                         |                       |                        |                      | P value,<br>trend |
|-------------------------------------------|-----|------------------------------------------------------------------------------------|-----------------------|-----------------------|----------------------|-------------------|------------------------------------------------------------------------------------|-----------------------|------------------------|----------------------|-------------------|
|                                           |     | <i>Regression coefficients (95% CI) compared with baseline group of 0 children</i> |                       |                       |                      |                   | <i>Regression coefficients (95% CI) compared with baseline group of 0 children</i> |                       |                        |                      |                   |
|                                           |     | 1                                                                                  | 2                     | 3                     | 4+                   |                   | 1                                                                                  | 2                     | 3                      | 4+                   |                   |
| <b>Fat Mass Index (kg/m<sup>2</sup>)</b>  |     |                                                                                    |                       |                       |                      |                   |                                                                                    |                       |                        |                      |                   |
| <i>Male</i>                               | 701 | 0.17<br>(-0.55,0.91)                                                               | -0.02<br>(-0.55,0.50) | -0.33<br>(-0.95,0.29) | 0.69<br>(-0.11,1.48) | 0.8               | -0.05<br>(-0.79,0.69)                                                              | -0.02<br>(-0.56,0.52) | -0.43<br>(-1.05,0.20)  | 0.64<br>(-0.17,1.45) | 0.9               |
| <i>Female</i>                             | 787 | 0.66<br>(-0.33, 1.64)                                                              | 0.13<br>(-0.65,0.91)  | 0.42<br>(-0.45,1.29)  | 0.75<br>(-0.33,1.83) | 0.3               | 0.38<br>(-0.62,1.38)                                                               | -0.03<br>(-0.82,0.76) | 0.23<br>(-0.65,1.10)   | 0.42<br>(-0.68,1.53) | 0.6               |
| <b>Lean Mass Index (kg/m<sup>2</sup>)</b> |     |                                                                                    |                       |                       |                      |                   |                                                                                    |                       |                        |                      |                   |
| <i>Male</i>                               | 701 | 0.98<br>(0.37,1.60)                                                                | 0.56<br>(0.11,1.00)   | 0.56<br>(0.03,1.08)   | 1.02<br>(0.35,1.69)  | 0.008*            | 0.85<br>(0.23,1.48)                                                                | 0.53<br>(0.08,0.98)   | 0.47<br>(-0.06,0.99)   | 1.05<br>(0.36,1.74)  | 0.02*             |
| <i>Female</i>                             | 787 | 0.14<br>(-0.39,0.66)                                                               | 0.03<br>(-0.39,0.44)  | 0.34<br>(-0.12,0.80)  | 0.42<br>(-0.15,0.99) | 0.07              | 0.10<br>(-0.43,0.64)                                                               | 0.03<br>(-0.39,0.46)  | 0.33<br>(-0.13,0.80)   | 0.39<br>(-0.20,0.98) | 0.08              |
| <b>Fat: Lean Mass ratio</b>               |     |                                                                                    |                       |                       |                      |                   |                                                                                    |                       |                        |                      |                   |
| <i>Male</i>                               | 701 | -0.01<br>(-0.05,0.02)                                                              | -0.02<br>(-0.04,0.01) | -0.03<br>(-0.06,0.00) | 0.01<br>(-0.03,0.05) | 0.07*             | -0.02<br>(-0.06,0.01)                                                              | -0.02<br>(-0.04,0.01) | -0.04<br>(-0.07,-0.01) | 0.01<br>(-0.03,0.05) | 0.05*             |
| <i>Female</i>                             | 787 | 0.05<br>(0.00,0.10)                                                                | 0.02<br>(-0.03,0.06)  | 0.02<br>(-0.03,0.06)  | 0.04<br>(-0.02,0.09) | 0.7               | 0.03<br>(-0.02,0.08)                                                               | 0.00<br>(-0.04,0.05)  | 0.00<br>(-0.04,0.05)   | 0.01<br>(-0.05,0.7)  | 0.9               |
| <b>Android Fat (kg)</b>                   |     |                                                                                    |                       |                       |                      |                   |                                                                                    |                       |                        |                      |                   |
| <i>Male</i>                               | 731 | 0.09<br>(-0.21,0.39)                                                               | 0.02<br>(-0.19,0.24)  | -0.08<br>(-0.33,0.17) | 0.24<br>(-0.08,0.56) | 0.7               | -0.01<br>(-0.31,0.29)                                                              | 0.00<br>(-0.21,0.22)  | -0.14<br>(-0.39,0.11)  | 0.21<br>(-0.11,0.54) | 0.9               |
| <i>Female</i>                             | 830 | 0.16<br>(-0.12,0.45)                                                               | 0.07<br>(-0.15,0.30)  | 0.15<br>(-0.10,0.39)  | 0.25<br>(-0.06,0.56) | 0.2               | 0.12<br>(-0.17,0.41)                                                               | 0.05<br>(-0.17,0.28)  | 0.12<br>(-0.13,0.38)   | 0.22<br>(-0.10,0.54) | 0.2               |

|                                      |       |                       |                       |                       |                      |       |                       |                       |                        |                      |       |
|--------------------------------------|-------|-----------------------|-----------------------|-----------------------|----------------------|-------|-----------------------|-----------------------|------------------------|----------------------|-------|
| <b>Gynoid Fat (kg)</b>               |       |                       |                       |                       |                      |       |                       |                       |                        |                      |       |
| <i>Male</i>                          | 731   | 0.14<br>(-0.17,0.45)  | 0.02<br>(-0.21,0.24)  | -0.01<br>(-0.27,0.26) | 0.31<br>(-0.02,0.65) | 0.4   | 0.08<br>(-0.24,0.40)  | 0.01<br>(-0.22,0.24)  | -0.03<br>(-0.30,0.24)  | 0.31<br>(-0.04,0.66) | 0.4   |
| <i>Female</i>                        | 830   | 0.10<br>(-0.31,0.52)  | -0.09<br>(-0.42,0.24) | 0.00<br>(-0.36,0.36)  | 0.20<br>(-0.25,0.65) | 0.7   | 0.04<br>(-0.39,0.46)  | -0.11<br>(-0.44,0.22) | 0.02<br>(-0.39,0.34)   | 0.15<br>(-0.31,0.62) | 0.8   |
| <b>Android/Gynoid Ratio</b>          |       |                       |                       |                       |                      |       |                       |                       |                        |                      |       |
| <i>Male</i>                          | 731   | -0.00<br>(-0.06,0.05) | 0.01<br>(-0.03,0.05)  | 0.00<br>(-0.05,0.05)  | 0.01<br>(-0.05,0.7)  | 0.9   | -0.01<br>(-0.07,0.05) | 0.01<br>(-0.03,0.05)  | -0.01<br>(-0.06,0.04)  | 0.01<br>(-0.05,0.08) | 0.9   |
| <i>Female</i>                        | 830   | 0.03<br>(-0.01,0.07)  | 0.03<br>(0.00,0.07)   | 0.02<br>(-0.01,0.06)  | 0.03<br>(-0.01,0.08) | 0.2   | 0.02<br>(-0.02,0.07)  | 0.03<br>(0.00,0.06)   | 0.02<br>(-0.01,0.06)   | 0.03<br>(-0.01,0.08) | 0.2   |
| <b>Body Mass Index (kg/m2)</b>       |       |                       |                       |                       |                      |       |                       |                       |                        |                      |       |
| <b>60-64</b>                         |       |                       |                       |                       |                      |       |                       |                       |                        |                      |       |
| <i>Male</i>                          | 990   | 0.77<br>(-0.26,1.80)  | 0.48<br>(-0.27,1.22)  | 0.36<br>(-0.52,1.25)  | 1.34<br>(0.17,2.51)  | 0.1   | 0.43<br>(-0.60,1.45)  | 0.38<br>(-0.36,1.13)  | 0.15<br>(-0.72,1.03)   | 1.26<br>(0.09,2.42)  | 0.3   |
| <i>Female</i>                        | 1,117 | 0.44<br>(-0.91,1.80)  | 0.35<br>(-0.74,1.43)  | 1.19<br>(0.00,2.38)   | 1.43<br>(-0.04,2.91) | 0.02  | 0.13<br>(-1.23,1.50)  | 0.11<br>(-0.98,1.21)  | 0.87<br>(-0.33,2.07)   | 1.07<br>(-0.42,2.56) | 0.05  |
| <b>Waist Circumference (cm)60-64</b> |       |                       |                       |                       |                      |       |                       |                       |                        |                      |       |
| <i>Male</i>                          | 990   | 0.99<br>(-1.80,3.78)  | 0.39<br>(-1.63,2.42)  | 0.49<br>(-1.91,2.88)  | 2.87<br>(-0.28,6.00) | 0.3   | -0.14<br>(-2.91,2.62) | 0.09<br>(-1.92,2.12)  | -0.03<br>(-2.41,2.35)  | 2.41<br>(-0.73,5.55) | 0.3   |
| <i>Female</i>                        | 1,115 | 1.56<br>(-1.66,4.79)  | 0.61<br>(-1.97,3.19)  | 1.30<br>(-1.53,4.13)  | 4.34<br>(0.82,7.86)  | 0.06  | 0.77<br>(-2.47,4.02)  | -0.04<br>(-2.64,2.56) | 0.48<br>(-2.37,3.33)   | 3.54<br>(-0.02,7.11) | 0.2   |
| <b>Body Mass Index (kg/m2)</b>       |       |                       |                       |                       |                      |       |                       |                       |                        |                      |       |
| <b>69</b>                            |       |                       |                       |                       |                      |       |                       |                       |                        |                      |       |
| <i>Male</i>                          | 961   | 1.46<br>(0.26,2.65)   | 0.37<br>(-0.53,1.27)  | 0.75<br>(-0.29,1.80)  | 1.92<br>(0.58,3.26)  | 0.01* | 1.07<br>(-0.11,2.26)  | 0.31<br>(-0.58,1.21)  | 0.58<br>(-0.46,1.62)   | 1.69<br>(0.34,3.03)  | 0.07* |
| <i>Female</i>                        | 1,047 | 0.23<br>(-1.22,1.68)  | 0.24<br>(-0.92,1.40)  | 1.06<br>(-0.20,2.33)  | 2.19<br>(0.61,3.78)  | 0.003 | -0.11<br>(-1.56,1.34) | -0.13<br>(-1.30,1.04) | 0.71<br>(0.-0.57,1.98) | 2.68<br>(0.08,3.29)  | 0.02  |
| <b>Waist Circumference</b>           |       |                       |                       |                       |                      |       |                       |                       |                        |                      |       |

| <b>(cm) 69</b> |       |                       |                      |                      |                      |        |                       |                       |                      |                      |       |
|----------------|-------|-----------------------|----------------------|----------------------|----------------------|--------|-----------------------|-----------------------|----------------------|----------------------|-------|
| <i>Male</i>    | 961   | 2.55<br>(-0.66,5.77)  | 0.57<br>(-1.85,2.99) | 1.34<br>(-1.46,4.14) | 5.97<br>(2.37,9.57)  | 0.006* | 1.35<br>(-1.86,4.55)  | 0.25<br>(-2.17,2.67)  | 0.85<br>(-1.95,3.65) | 5.09<br>(1.47,8.70)  | 0.04* |
| <i>Female</i>  | 1,053 | -0.17<br>(-3.72,3.36) | 0.13<br>(-2.70,2.97) | 2.00<br>(-1.10,5.10) | 3.70<br>(-0.17,7.58) | 0.02   | -1.33<br>(-4.88,2.21) | -1.00<br>(-3.86,1.86) | 0.87<br>(-2.24,3.98) | 2.25<br>(-1.67,6.17) | 0.1   |

203

204 \*Test for heterogeneity across groups when test for deviation from linearity gives  $P \leq 0.05$ .

205 \*\* Adjusted model includes childhood cognitive function, childhood and adult socioeconomic position, education and cigarette smoking.

206

**Table.3 Adjusted (adjusted model includes childhood cognitive function, childhood and adult socioeconomic position, education and cigarette smoking) regression coefficients (mean differences) and 95% confidence intervals (95% CI) for each measure of body composition and anthropometric measures aged 60-64 and 69 for (a) parents versus non-parents, and (b) number of children for parents only – reference group 1 child.**

| Outcome Variable                     | N   | Model a – Regression Coefficient (95% CI) comparing those with children to those with no children | P value | N   | Model b - Regression coefficients (95% CI) compared with baseline group of 1 child, those with no children excluded |                    |                    | P value, trend |
|--------------------------------------|-----|---------------------------------------------------------------------------------------------------|---------|-----|---------------------------------------------------------------------------------------------------------------------|--------------------|--------------------|----------------|
|                                      |     |                                                                                                   |         |     | 2                                                                                                                   | 3                  | 4+                 |                |
| <b>Fat Mass Index (kg/m2)</b>        |     |                                                                                                   |         |     |                                                                                                                     |                    |                    |                |
| Male                                 | 701 | -0.07 (-0.58,0.45)                                                                                | 0.8     | 607 | 0.03 (-0.58,0.65)                                                                                                   | -0.38 (-1.08,0.31) | 0.67 (-0.18,1.52)  | 0.05*          |
| Female                               | 787 | 0.13 (-0.62,0.88)                                                                                 | 0.7     | 691 | -0.38 (-1.16,0.39)                                                                                                  | -0.12 (-0.97,0.74) | 0.04 (-1.03,1.11)  | 0.7            |
| <b>Lean Mass Index (kg/m2)</b>       |     |                                                                                                   |         |     |                                                                                                                     |                    |                    |                |
| Male                                 | 701 | 0.59 (0.15,1.02)                                                                                  | 0.008   | 607 | -0.32 (-0.84,0.20)                                                                                                  | -0.39 (-0.97,0.19) | 0.18 (-0.54,0.90)  | 0.8            |
| Female                               | 787 | 0.15 (-0.25,0.55)                                                                                 | 0.5     | 691 | -0.06 (-0.48,0.36)                                                                                                  | 0.25 (-0.22,0.72)  | 0.29 (-0.29,0.87)  | 0.08           |
| <b>Fat: Lean Mass ratio</b>          |     |                                                                                                   |         |     |                                                                                                                     |                    |                    |                |
| Male                                 | 701 | -0.02 (-0.04,0.00)                                                                                | 0.1     | 607 | 0.01 (-0.02,0.04)                                                                                                   | -0.01 (-0.05,0.02) | 0.03 (-0.01,0.07)  | 0.07*          |
| Female                               | 787 | 0.01 (-0.03,0.05)                                                                                 | 0.7     | 691 | -0.03 (-0.07,0.02)                                                                                                  | -0.03 (-0.07,0.02) | -0.02 (-0.08,0.04) | 0.5            |
| <b>Android Fat (kg)</b>              |     |                                                                                                   |         |     |                                                                                                                     |                    |                    |                |
| Male                                 | 731 | -0.01 (-0.22,0.20)                                                                                | 0.9     | 635 | 0.02 (-0.23,0.28)                                                                                                   | -0.13 (-0.41,0.15) | 0.22 (-0.12,0.57)  | 0.8            |
| Female                               | 830 | 0.09 (-0.12,0.31)                                                                                 | 0.4     | 731 | -0.07 (-0.29,0.16)                                                                                                  | 0.00 (-0.24,0.26)  | 0.09 (-0.22,0.40)  | 0.4            |
| <b>Gynoid Fat (kg)</b>               |     |                                                                                                   |         |     |                                                                                                                     |                    |                    |                |
| Male                                 | 731 | 0.03 (-0.19,0.25)                                                                                 | 0.8     | 631 | -0.06 (-0.32,0.21)                                                                                                  | -0.11 (-0.41,0.18) | 0.23 (-0.14,0.60)  | 0.4            |
| Female                               | 830 | -0.05 (-0.36,0.27)                                                                                | 0.8     | 731 | -0.14 (-0.47,0.19)                                                                                                  | -0.04 (-0.40,0.32) | 0.11 (-0.34,0.56)  | 0.4            |
| <b>Android/Gynoid Ratio</b>          |     |                                                                                                   |         |     |                                                                                                                     |                    |                    |                |
| Male                                 | 731 | 0.00 (-0.03,0.04)                                                                                 | 0.8     | 635 | 0.02 (-0.03,0.07)                                                                                                   | 0.00 (-0.05,0.05)  | 0.02 (-0.04,0.09)  | 0.9            |
| Female                               | 830 | 0.03 (0.00,0.06)                                                                                  | 0.1     | 731 | 0.00 (-0.03,0.04)                                                                                                   | 0.00 (-0.04,0.03)  | 0.01 (-0.04,0.05)  | 0.9            |
| <b>Body Mass Index (kg/m2) 60-64</b> |     |                                                                                                   |         |     |                                                                                                                     |                    |                    |                |

|                                       |       |                    |     |     |                    |                    |                    |       |
|---------------------------------------|-------|--------------------|-----|-----|--------------------|--------------------|--------------------|-------|
| <i>Male</i>                           | 990   | 0.40 (-0.30,1.12)  | 0.3 | 841 | -0.04 (-0.92,0.84) | -0.29 (-1.28,0.70) | 0.77 (-0.47 ,2.01) | 0.5   |
| <i>Female</i>                         | 1,117 | 0.37 (-0.67,1.42)  | 0.7 | 995 | 0.00 (-1.06,1.05)  | 0.75 (-0.41,1.91)  | 0.93 (-0.52,2.38)  | 0.05  |
| <b>Waist Circumference (cm) 60-64</b> |       |                    |     |     |                    |                    |                    |       |
| <i>Male</i>                           | 990   | 0.24 (-1.68,2.16)  | 0.8 | 841 | 0.17 (-2.18,2.53)  | -0.03 (-2.68,2.61) | 2.27 (-1.05,5.60)  | 0.3   |
| <i>Female</i>                         | 1,115 | 0.48 (-2.02,2.97)  | 0.7 | 993 | -0.76 (-3.23,1.72) | -0.23 (-2.96,2.50) | 2.68 (-0.75,6.10)  | 0.1   |
| <b>Body Mass Index (kg/m2) 69</b>     |       |                    |     |     |                    |                    |                    |       |
| <i>Male</i>                           | 961   | 0.56 (-0.30,1.42)  | 0.2 | 840 | -0.76 (-1.73,0.20) | -0.49 (-1.58,0.20) | 0.51 (-0.86,1.89)  | 0.10* |
| <i>Female</i>                         | 1,047 | 0.24 (-0.88,1.36)  | 0.7 | 934 | -0.01 (-1.12,1.11) | 0.84 (-0.39,2.07)  | 1.75 (0.19,3.31)   | 0.005 |
| <b>Waist Circumference (cm) 69</b>    |       |                    |     |     |                    |                    |                    |       |
| <i>Male</i>                           | 961   | 0.85 (-1.48,3.19)  | 0.7 | 840 | -1.10 (-3.69,1.48) | -0.55 (-3.43,2.42) | 3.66 (-0.01,7.34)  | 0.02* |
| <i>Female</i>                         | 1,053 | -0.34 (-3.07,2.40) | 0.8 | 939 | 0.35 (-2.37,3.07)  | 2.25 (-0.74,5.24)  | 3.37 (-0.43,7.18)  | 0.02  |

207

208 \*Test for heterogeneity across groups when test for deviation from linearity gives  $P \leq 0.0$

209

The associations with lean mass index for men and women remained after adjustment for fat mass index.

(Table.4).



**Table 4. Regression models for lean mass index (kg/m<sup>2</sup>) adjusted for fat mass index (kg/m<sup>2</sup>).**

| Lean Mass Index (kg/m <sup>2</sup> )<br>Adjusted for Fat Mass Index<br>(kg/m <sup>2</sup> ) | Number of Children |                 |                    |                    |                     |                    | P Value |
|---------------------------------------------------------------------------------------------|--------------------|-----------------|--------------------|--------------------|---------------------|--------------------|---------|
|                                                                                             | N                  | 0               | 1                  | 2                  | 3                   | 4+                 |         |
| <b>Unadjusted Regression Coefficients</b>                                                   |                    |                 |                    |                    |                     |                    |         |
| Male                                                                                        | 701                | Reference Group | 0.90 (0.39,1.40)   | 0.57 (0.21,0.93)   | 0.72 (0.29,1.15)    | 0.69 (0.14,1.24)   | 0.003*  |
| Female                                                                                      | 787                | Reference Group | -0.10 (-0.48,0.29) | -0.02 (-0.33,0.29) | 0.19 (-0.15,0.53)   | 0.15 (-0.27,0.57)  | 0.07    |
| <b>Adjusted Regression Coefficients</b>                                                     |                    |                 |                    |                    |                     |                    |         |
| Male                                                                                        | 701                | Reference Group | 0.88 (0.36,1.40)   | 0.54 (0.17,0.91)   | 0.67 (0.24,1.11)    | 0.75 (0.18,1.31)   | 0.007*  |
| Female                                                                                      | 787                | Reference Group | -0.03 (-0.43,0.36) | 0.04 (-0.27,0.36)  | 0.25 (-0.09,0.60)   | 0.24 (-0.20,0.67)  | 0.06    |
| <b>With Children Versus No Children</b>                                                     |                    |                 |                    |                    |                     |                    |         |
| Male                                                                                        | 701                | Reference Group |                    |                    | 0.62 (0.26,0.98)**  |                    | 0.001   |
| Female                                                                                      | 787                | Reference Group |                    |                    | 0.10 (-0.19,0.40)** |                    | 0.5     |
| <b>With At Least 1 Child</b>                                                                |                    |                 |                    |                    |                     |                    |         |
| Male                                                                                        | 607                | -               | Reference Group    | -0.33 (-0.76,0.08) | -0.20 (-0.69,0.27)  | -0.14 (-0.73,0.44) | 0.99    |
| Female                                                                                      | 691                | -               | Reference Group    | 0.07 (-0.24,0.39)  | 0.29 (-0.06,0.64)   | 0.27 (-0.16,0.72)  | 0.06    |

215

216 \* Test for heterogeneity across groups when test for deviation from linearity gives  $P \leq 0.05$ .

217 \*\* Combines categories 1 to 4+

218

## 219 **BMI and WC**

220 BMI at age 60-64 increased with increasing parity, with the highest regression coefficients among women  
221 with 3 or 4+ children. For WC the trend was weaker, although those with 4+ children had the highest mean  
222 (Table.2). There is no evidence of a difference between those with children and those without for either  
223 BMI and WC with weak increasing trends among parous women. Among men, no evidence of trends  
224 across groups were observed, although those with 4+ children had higher mean BMI and WC than other  
225 groups. No significant sex interactions were observed for either BMI or WC (Table.2). Linear associations  
226 for both outcomes are attenuated in women following adjustment, but remain significant for BMI ( $p=0.05$ ,  
227 Table.2).

228 The trends of increasing BMI and WC with increasing number of children in women are stronger at age 69  
229 than at age 60-64. In men, associations are also observed at 69 years with mean levels highest in those with  
230 4+ children (Table.2). Associations are slightly attenuated in adjusted models.

## 231 **Sensitivity analysis**

232 The mean BMI and WC at 60-64 were lower in men and women who had a DXA scan compared with  
233 those who did not (two tailed t-test,  $P<0.001$ ). Regression analysis showed weaker associations between  
234 number of children and both BMI and WC in the unadjusted and adjusted model for those that attended the  
235 DXA compared to the whole sample (S1. Table).

236

## **Discussion**

237 There was no clear evidence of a consistent association between number of children and body composition  
238 in early old age in either men or women and no evidence of clear sex differences in associations. Lean  
239 mass index was higher in men with children than those without children, while men with 4+ children had  
240 higher fat-lean ratio than others. In women, there was weak evidence of increasing lean mass index with  
241 increasing number of children and higher android:gynoid fat mass ratio in those with compared to without  
242 children. Both BMI and WC at ages 60-64 and, more clearly, at 69 years increased with increasing

243 numbers of children in women, whilst highest mean BMI and WC was observed among men with 4+  
244 children, particularly at 69 years.

245 Limited previous research has investigated the association between number of children and body  
246 composition, particularly in men or at older ages. The weak association between having children and  
247 higher android:gynoid fat mass ratio could be consistent with existing research showing increases in  
248 visceral fat measured using computed tomography (CT) scans, although not fat mass measured by DXA,  
249 among 14 women who had a child within a 5 year interval compared with 108 who did not(21). Another  
250 small study (n=170) in an age-heterogeneous group of women from 18-70 years found that after  
251 adjustment, increasing number of children was associated with increasing intra-abdominal adipose tissue  
252 but not with total fat mass(20). Other research in a larger sample of women from Korea with body  
253 composition measured at older ages (45 years and older) has shown younger age at first birth (those with  
254 younger age at first birth tend to have a higher number of children) to be associated with higher total and  
255 truncal fat mass measured using DXA(22).

256 Our finding of associations, particularly among women, between number of children and BMI are more  
257 consistent with previous findings. In previous research carried out using the NSHD cohort at age 53, BMI  
258 from age 36 was found to increase with increasing number of children in both men and women with  
259 stronger associations in women, although associations in women showed greater attenuation once adjusted  
260 for social factors, and no sex interactions were identified (1). A study by Lawlor et al (2002) also found  
261 linear associations in men and women for both BMI and WHR, with stronger associations observed in  
262 women and attenuation to the null for WHR in men once adjusted for lifestyle risk factors and SEP, but no  
263 attenuation in women. Two US studies found no evidence that number of children increased weight gain  
264 more in women than in men (9, 10) with one even finding greater weight gain among men when stratified  
265 according to SEP and race (10).

266 To our knowledge no other studies have considered associations with lean mass, the outcome where we  
267 observed the strongest associations. That we found higher mean lean mass index in men who had children  
268 compared to those who did not and, more weakly, increasing lean mass index with increasing parity in  
269 women could indicate a degree of selection into parenthood. This effect could be greater for men, this is  
270 consistent with previous research in NSHD finding that physical performance, including grip strength

271 which is an indicator of muscle strength, was lower among unmarried and childless men compared to  
272 others (26). An alternative explanation for the greater muscle mass among those with children is that with  
273 increasing fat mass, muscle mass also increases to accommodate carrying the extra weight (25), although  
274 the associations remained once models were adjusted for fat mass index. It is possible that this selection  
275 could simultaneously occur with a second process of accumulation of fat associated with high numbers of  
276 children given the higher fat: lean mass ratio among men with 4+ children.

277 Our findings suggest that for women the effects of pregnancy on body composition in older age are likely  
278 to be small. While the similar associations in men and women for BMI and WC, which are somewhat  
279 attenuated after adjustment instead, suggest that the changing social contexts associated with parenthood  
280 for both sexes are likely to be key in explaining those associations. Our research extends previous findings  
281 by showing that such associations extend into old age. It has been found that the diets of parents contain  
282 more saturated fat than non-parents (14, 28, 29) and an increased intake of sugar sweetened beverages and  
283 total energy (28). Physical activity has also been identified as being lower in parents compared to non-  
284 parents (28-32). Some research has found that inactivity is associated with increased parity in women (31)  
285 whilst others have found that motherhood itself, as opposed to number of children, is key in explaining  
286 reduced levels of physical activity (30).

287 Barriers to maintaining physical activity such as guilt, family responsibilities, lack of support, scheduling  
288 constraints, and work have been identified as reasons for the difference in activity patterns between parents  
289 and non-parents (33). Some studies have even found that identities formed around being a parent  
290 contradict positive health behaviours (34) as there is a shift from prioritising individual needs to that of  
291 their children and family (33, 34). Where parents have been able to maintain physical activity after  
292 childbirth, exercise levels before and during pregnancy, exercise self-efficacy (35, 36) and the ability to  
293 develop strategies to incorporate exercise into family life (33) have been highlighted. Additional possible  
294 behaviour changes in parents relate to smoking and drinking, with research focusing solely on mothers  
295 finding both increased levels of smoking (29, 31) and drinking (31) compared to non-mothers.

296 There are some limitations with the current study. Firstly, body composition was measured only at age 60-  
297 64 meaning that associations with the number of children could not be assessed closer to age of  
298 childbearing in order to see whether the associations change with increasing age. Moreover, the use of

299 DXA scans do not provide detailed insight to levels of visceral compared to subcutaneous fat which may  
300 be more relevant for pregnancy. However, research has shown that DXA is a suitable method for assessing  
301 body composition, with high correlations between android fat measured by DXA scans and visceral fat  
302 measured by CT scans (37, 38). Additionally if the effects of number of children on outcomes are small,  
303 and greatest at high parity, our study may lack power to investigate the effect of high numbers of children  
304 due to few individuals with 4 or more children. However, the study had the power to observe associations  
305 with BMI.

306 There is possibility of selection bias through loss to follow up if those individuals who have dropped out of  
307 the study or died differ in their relationship between number of children and the outcome variables.  
308 Further, the sample who attended clinics for DXA assessment have previously been shown to be healthier  
309 than those who participated in home visits (and who had basic anthropometric measures but not DXA).  
310 The sensitivity analysis provided some evidence to suggest that associations may be weaker in the sample  
311 who attended clinics as the association with BMI was weaker in this group.

312 Our findings are from a sample born in Britain 1946 (39) and although the cohort is nationally  
313 representative of the population at the time of recruitment, it does not include immigrants into Britain of  
314 the same age and may not be representative of later generations. Research suggests that more recent  
315 cohorts are experiencing the obesogenic environment earlier in the life course (40) and childbearing  
316 patterns have changed such that on the whole couples have later and fewer births, therefore associations  
317 may vary between cohorts. Nevertheless, adjustment of social factors relevant to the cohort under study  
318 would be expected to result in a consistent biological effect of pregnancy, if one exists.

319 The current research is, to the best of our knowledge, unique in that it uses DXA imaging to measure body  
320 composition, rather than relying on more general anthropometric measures which cannot distinguish fat  
321 from lean mass, in a large western sample and which includes men as well as women. The current study  
322 also measures body composition as well as BMI and WC into older age.

323 Our findings suggest little evidence of a biological effect of pregnancy in women on body composition in  
324 older age. Social pathways, contexts and behaviours associated with parenthood are more likely to explain  
325 the persisting associations observed with more general measures of adiposity, BMI and WC, and selection  
326 into parenthood may explain associations with lean mass, particularly in men. As parents have been

327 recognised as important in the development of health behaviours, such as physical activity engagement  
328 (41), in their children, these pathways could also have knock on effect on children's propensity to  
329 overweight. Therefore, public health initiatives should focus on adapting the social contexts of parenthood  
330 and the health behaviours in families, as opposed to focusing on the timing and processes of pregnancy.

## 331 **Acknowledgements**

332 We thank NSHD study members for their lifelong participation and past and present members of the  
333 NSHD study team who helped to collect the data. Data used in this publication are available to bona fide  
334 researchers upon request to the NSHD Data Sharing Committee via a standard application procedure.

335 Further details can be found at <http://www.nshd.mrc.ac.uk/data>. doi:10.5522/NSHD/Q101;

336 doi:10.5522/NSHD/Q102

337 CBS is supported by a PhD studentship from the UK Medical research Council (MR/N013867/1). The

338 MRC NSHD and RH are supported by the UK Medical Research Council (MC\_UU\_12019/1,

339 MC\_UU\_12019/2).

## 340 **References**

341 1. Hardy R, Lawlor DA, Black S, Wadsworth ME, Kuh D. Number of children and coronary heart

342 disease risk factors in men and women from a British birth cohort. *BJOG*. 2007;114(6):721-30.

343 2. Umberson D, Liu H, Mirowsky J, Reczek C. Parenthood and trajectories of change in body weight

344 over the life course. *Soc Sci Med*. 2011;73(9):1323-31.

345 3. Davis EM, Zyzanski SJ, Olson CM, Stange KC, Horwitz RI. Racial, Ethnic, and Socioeconomic

346 Differences in the Incidence of Obesity Related to Childbirth. *Am J Public Health*. 2009;99(2):294-9.

347 4. Hardy R, Lawlor DA, Black S, Mishra GD, Kuh D. Age at birth of first child and coronary heart

348 disease risk factors at age 53 years in men and women: British birth cohort study. *J Epidemiol Community*

349 *Health*. 2009;63(2):99-105.

350 5. Abraham C, Michie S. A taxonomy of behavior change techniques used in interventions. *Health*

351 *Psychol*. 2008;27(3):379-87.

- 352 6. Ngo AD, Roberts CL, Figtree G. Association between interpregnancy interval and future risk of  
353 maternal cardiovascular diseasea population-based record linkage study. *Bjog-Int J Obstet Gy.*  
354 2016;123(8):1311-8.
- 355 7. Parikh NI, Cnattingius S, Mittleman MA, Ludvigsson JF, Ingelsson E. Subfertility and risk of later  
356 life maternal cardiovascular disease. *Hum Reprod.* 2012;27(2):568-75.
- 357 8. Lawlor DA, Emberson JR, Ebrahim S, Whincup PH, Wannamethee SG, Walker M, et al. Is the  
358 association between parity and coronary heart disease due to biological effects of pregnancy or adverse  
359 lifestyle risk factors associated with child-rearing? - Findings from the British women's heart and health  
360 study and the British regional heart study. *Circulation.* 2003;107(9):1260-4.
- 361 9. Weng HLH, Bastian LA, Taylor DH, Moser BK, Ostbye T. Number of children associated with  
362 obesity in middle-aged women and men: Results from the Health and Retirement Study. *Journal of*  
363 *Womens Health.* 2004;13(1):85-91.
- 364 10. Brown DM, Abrams B, Cohen AK, Rehkopf DH. Motherhood, fatherhood and midlife weight  
365 gain in a US cohort: Associations differ by race/ethnicity and socioeconomic position. *SSM - Population*  
366 *Health.* 2017;3:558-65.
- 367 11. Abrams B, Heggeseth B, Rehkopf D, Davis E. Parity and Body Mass Index in US Women: A  
368 Prospective 25-Year Study. *Obesity.* 2013;21(8):1514-8.
- 369 12. Laroche HH, Wallace RB, Snetselaar L, Hillis SL, Cai XY, Steffen LM. Weight Gain among Men  
370 and Women Who Have a Child Enter Their Home. *J Acad Nutr Diet.* 2013;113(11):1504-10.
- 371 13. Lee SK, Sobal J, Frongillo EA, Olson CM, Wolfe WS. Parity and body weight in the United  
372 States: Differences by race and size of place of residence. *Obes Res.* 2005;13(7):1263-9.
- 373 14. Laroche HH, Wallace RB, Snetselaar L, Hillis SL, Steffen LM. Changes in Diet Behavior when  
374 Adults Become Parents. *J Acad Nutr Diet.* 2012;112(6):832-9.
- 375 15. Baker L, Meldrum KK, Wang MJ, Sankula R, Vanam R, Raiesdana A, et al. The role of estrogen  
376 in cardiovascular disease. *J Surg Res.* 2003;115(2):325-44.
- 377 16. Li WD, Wang Y, Shen LJ, Song LL, Li H, Liu BQ, et al. Association between parity and obesity  
378 patterns in a middle-aged and older Chinese population: a cross-sectional analysis in the Tongji-Dongfeng  
379 cohort study. *Nutr Metab (Lond).* 2016;13:72 doi: 10.1186/s12986-016-0133-7

- 380 17. Okosun IS, Seale JP, Lyn R. Commingling effect of gynoid and android fat patterns on  
381 cardiometabolic dysregulation in normal weight American adults. *Nutr Diabetes*. 2015;5(5):e155-  
382 doi:10.1038/nutd.2015.5.
- 383 18. Kang SM, Yoon JW, Ahn HY, Kim SY, Lee KH, Shin H, et al. Android Fat Depot Is More  
384 Closely Associated with Metabolic Syndrome than Abdominal Visceral Fat in Elderly People. *PLoS One*.  
385 2011;6(11) :e27694. doi:10.1371/journal.pone.0027694.
- 386 19. Vasan SK, Osmond C, Canoy D, Christodoulides C, Neville MJ, Di Gravio C, et al. Comparison  
387 of regional fat measurements by dual-energy X-ray absorptiometry and conventional anthropometry and  
388 their association with markers of diabetes and cardiovascular disease risk. *Int J Obes*. 2018;42(4):850-7.
- 389 20. Blaudeau TE, Hunter GR, Sirikul B. Intra-abdominal adipose tissue deposition and parity. *Int J*  
390 *Obes*. 2006;30(7):1119-24.
- 391 21. Gunderson EP, Sternfeld B, Wellons MF, Whitmer RA, Chiang V, Quesenberry CP, et al.  
392 Childbearing may increase visceral adipose tissue independent of overall increase in body fat. *Obesity*.  
393 2008;16(5):1078-84.
- 394 22. Sim JH, Chung D, Lim JS, Lee MY, Chung CH, Shin JY, et al. Maternal Age at First Delivery Is  
395 Associated with the Risk of Metabolic Syndrome in Postmenopausal Women: From 2008-2010 Korean  
396 National Health and Nutrition Examination Survey. *PLoS One*. 2015; 10(5): e0127860.  
397 <https://doi.org/10.1371/journal.pone.0127860>
- 398 23. Lim U, Ernst T, Buchthal SD, Latch M, Albright CL, Wilkens LR, et al. Asian women have  
399 greater abdominal and visceral adiposity than Caucasian women with similar body mass index. *Nutr*  
400 *Diabetes*. 2011;1(5):e6-. doi:10.1038/nutd.2011.2.
- 401 24. Bann D, Wills A, Cooper R, Hardy R, Sayer AA, Adams J, et al. Birth weight and growth from  
402 infancy to late adolescence in relation to fat and lean mass in early old age: findings from the MRC  
403 National Survey of Health and Development. *Int J Obes*. 2014;38(1):69-75.
- 404 25. Cooper R, Hardy R, Bann D, Sayer AA, Ward KA, Adams JE, et al. Body Mass Index From Age  
405 15 Years Onwards and Muscle Mass, Strength, and Quality in Early Old Age: Findings From the MRC  
406 National Survey of Health and Development. *Journals of Gerontology Series a-Biological Sciences and*  
407 *Medical Sciences*. 2014;69(10):1253-9.



- 408 26. Guralnik JM, Butterworth S, Patel K, Mishra G, Kuh D. Reduced midlife physical functioning  
409 among never married and childless men: evidence from the 1946 British Birth Cohort Study. *Aging Clin*  
410 *Exp Res.* 2009;21(2):174-81.
- 411 27. Stafford M, Black S, Shah I, Hardy R, Pierce M, Richards M, et al. Using a birth cohort to study  
412 ageing: representativeness and response rates in the National Survey of Health and Development.  
413 *European Journal of Ageing.* 2013;10(2):145-57.
- 414 28. Berge JM, Larson N, Bauer KW, Neumark-Sztainer D. Are Parents of Young Children Practicing  
415 Healthy Nutrition and Physical Activity Behaviors? *Pediatrics.* 2011;127(5):881-7.
- 416 29. Gennaro S, Fehder W. Health behaviors in postpartum women. *Fam Community Health.*  
417 2000;22(4):16-26.
- 418 30. Bellows-Riecken KH, Rhodes RE. A birth of inactivity? A review of physical activity and  
419 parenthood. *Prev Med.* 2008;46(2):99-110.
- 420 31. Shen LJ, Wu J, Xu GQ, Song LL, Yang SY, Yuan J, et al. Parity and Risk of Coronary Heart  
421 Disease in Middle-aged and Older Chinese Women. *Sci Rep.* 2015;5:16834. doi:10.1038/srep16834.
- 422 32. Pereira MA, Rifas-Shiman SL, Kleinman KP, Rich-Edwards JW, Peterson KE, Gillman MW.  
423 Predictors of Change in Physical Activity During and After Pregnancy: Project Viva. *Am J Prev Med.*  
424 2007;32(4):312-9.
- 425 33. Mailey EL, Huberty J, Dinkel D, McAuley E. Physical activity barriers and facilitators among  
426 working mothers and fathers. *BMC Public Health.* 2014;14(1):657. [https://doi.org/10.1186/1471-2458-14-](https://doi.org/10.1186/1471-2458-14-657)  
427 657
- 428 34. Warin M, Turner K, Moore V, Davies M. Bodies, mothers and identities: rethinking obesity and  
429 the BMI. *Sociol Health Illn.* 2008;30(1):97-111.
- 430 35. Hinton PS, Olson CM. Postpartum exercise and food intake: The importance of behavior-specific  
431 self-efficacy. *J Am Diet Assoc.* 2001;101(12):1430-7.
- 432 36. S. Hinton P, M. Olson C. Predictors of Pregnancy-Associated Change in Physical Activity in a  
433 Rural White Population2001. 7-14 p.
- 434 37. Bredella MA, Ghomi RH, Thomas BJ, Torriani M, Brick DJ, Gerweck AV, et al. Comparison of  
435 DXA and CT in the Assessment of Body Composition in Premenopausal Women With Obesity and  
436 Anorexia Nervosa. *Obesity.* 2010;18(11):2227-33.

- 437 38. Snijder MB, Visser M, Dekker JM, Seidell JC, Fuerst T, Tylavsky F, et al. The prediction of  
438 visceral fat by dual-energy X-ray absorptiometry in the elderly: a comparison with computed tomography  
439 and anthropometry. *Int J Obes*. 2002;26(7):984-93.
- 440 39. Kuh D, Pierce M, Adams J, Deanfield J, Ekelund U, Friberg P, et al. Cohort Profile: Updating the  
441 cohort profile for the MRC National Survey of Health and Development: a new clinic-based data  
442 collection for ageing research. *Int J Epidemiol*. 2011;40(1):e1-e9.
- 443 40. Johnson W, Li L, Kuh D, Hardy R. How Has the Age-Related Process of Overweight or Obesity  
444 Development Changed over Time? Co-ordinated Analyses of Individual Participant Data from Five United  
445 Kingdom Birth Cohorts. *PLoS Med*. 2015;12(5):e1001828. doi:10.1371/journal.pmed.1001828
- 446 41. Ormelas IJ, Perreira KM, Ayala GX. Parental influences on adolescent physical activity: a  
447 longitudinal study. *Int J Behav Nutr Phys Act*. 2007;4:3. doi:10.1186/1479-5868-4-3.

448

## Supporting information captions

449

450

451 **S.1 Table. Sensitivity Analysis - unadjusted and adjusted regressions for anthropometric measures**  
452 **aged 60-64 comparing full sample (those who had a home visit as well as those who attended the**  
453 **CRF) with only those who attended the CRF and thus also had a DXA scan. \*\* Adjusted model**  
454 includes childhood cognitive function, childhood and adult socioeconomic position, education and  
455 cigarette smoking.
